# Supplementary material for: Hemorrhagic Fever-Causing Arenaviruses: Lethal Pathogens and Potent Immune Suppressors
Source: Front Immunol. 2019 Mar 13;10:372. doi: 10.3389/fimmu.2019.00372 (PMC6424867; doi:10.3389/fimmu.2019.00372)
Supplement: Supplemental Table 1 — Summary of documented cases of international importation of Lassa fever. [file Table_1.XLSX]

## Sheet: Sheet1
Traveler's country of origin	Virus' country of origin	Purpose of travel	Country of Import	Traveler's Age	Traveler's gender	Date of symptom onset	Date of import	Symptoms in country of onset	Symptoms in imported country	Reference
USA	Nigeria	Nurse	USA-NYC	Unknown	Unknown	Unknown	1969	Unknown	Fever, malaise, headache, nause, sore throat, epigstric/right upper quadrant tenderness, pleural effusion, facial/ cervical edema, dysphagia, elevated transaminases, cough, dyspnea, pulmonary infiltrates, epiglottal edema, lethargy, nystagmus, lightheadedness, dizziness without vertigo, ataxia, alopecia	66
Unknown	Sierra Leone	Nurse	UK	Unknown	Unknown	Unknown	1971	Unknown	Survived	66
Unknown	Sierra Leone	Physician	UK	Unknown	Unknown	Unknown	1971	Unknown	Survived	66
Unknown	Sierra Leone	Nurse	UK	Unknown	Unknown	Unknown	1972	Unknown	Survived	66
Unknown	Nigeria	Physician	Germany	Unknown	Unknown	Unknown	1974	Unknown	Survived	66
Unknown	Nigeria	Physician	Germany	Unknown	Unknown	Unknown	1974	Unknown	Survived	66
Unknown	Nigeria	Physician	UK	Unknown	Unknown	Unknown	1975	Unknown	Death	66
USA	Sierra Leone	Aid worker	USA- DC	26	F	1975- February	1975- March	Severe abdominal pain- Discharged from hospital	Watery diarrhea, fever, chills, headache, myalgias, athralgias, conjunctival injection, posterior, cervical, axillary and phadenopathy, weight loss, pleuritic chest pain, unilateral pleural effusion, eosinophilia, sudden-onset unilateral sensorineural hearing loss	66
Unknown	Nigeria	Engineer	UK	Unknown	Unknown	Unknown	1976	Unknown	Survived	66
USA	Sierra Leone	Aid worker	USA- DC	43	F	1975- December	1976- March	Abdominal cramps, nausea, vomiting, diarrhea, fatigue, headaches, retroorbital pain, aching shoulders, eventual severe full body pain, nocturnal fever, dizziness, syncope, hypotension, insomnia, short remission, relapse with persistent vomiting, shooting pain in right ear, neck pain, parasthesias, alopecia, weight loss	Fatigue, headache, neck pain, nausea, low back pain, insomnia, costochondral and diffuse abdominal tenderness, ecchymoses at intramuscular injection sites, eye pain and fatigue, dysmorphopsias, temporary sensorineural haring loss, severe depression, lightheadedness, dizziness, vertigo, hypotension, left-sided facial weakness, right-sided Babinski reflex. Permanent symptoms of fatigue, generalized…	66
Unknown	Upper Volta	Aid worker	Netherlands	Unknown	Unknown	Unknown	1980	Unknown	Survived	66
Unknown	Nigeria	Teacher	UK	Unknown	Unknown	Unknown	1981	Unknown	Survived	66
Unknown	Nigeria	Diplomat	UK	Unknown	Unknown	Unknown	1982	Unknown	Survived	66
Unknown	Sierra Leone	Geologist	UK	Unknown	Unknown	Unknown	1984	Unknown	Survived	66
Unknown	Sierra Leone	Nurse	UK	Unknown	Unknown	Unknown	1985	Unknown	Survived	66
Unknown	Sierra Leone/ Liberia	Engineer	Israel	Unknown	Unknown	Unknown	1987	Unknown	Survived	66
Unknown	Sierra Leone	Engineer	Japan	Unknown	Unknown	Unknown	1987	Unknown	Survived	66
USA	Nigeria	Engineer	USA- Chicago	Unknown	Unknown	Unknown	1989	Unknown	Shaking, chills, fever, sore throat, myalgia, headache, dysphagia, bloody diarrhea, elevated transamines, hypotension, adult resipratory distress syndrome, death	66
Unknown	Nigeria	Agricultural specialist	Canada	Unknown	Unknown	Unknown	1989	Unknown	Survived	66
Unknown	Côte d’Ivoire/ Burkina Faso. Ghana	Student	Germany	Unknown	Unknown	Unknown	2000	Unknown	Death	66
Unknown	Sierra Leone	Peacekeeper	UK	Unknown	Unknown	Unknown	2000	Unknown	Death	66
Unknown	Nigeria	Unknown	Germany	Unknown	Unknown	Unknown	2000	Unknown	Death	66
Unknown	Sierra Leone	Physician	Netherlands	Unknown	Unknown	Unknown	2000	Unknown	Death	66
Unknown	Sierra Leone	Peacekeeper	UK	Unknown	Unknown	Unknown	2003	Unknown	Survived	66
Liberia	Sierra Leone	Businessperson	USA- Trenton, NJ	Unknown	Unknown	Unknown	2004	Unknown	Chills, fever, sore throat, diarrhea, back pain, adult respiratory distress syndrome, death	66
USA	Liberia	Traveler	USA- Pennsylvania	47	M	2010- January	2010- January	Day of departure- Fever, chills, knee and ankle pain, anorexia, sore throat, diffuse skin tenderness, mild shortness of breath	By 5 day sof illness- high fever, cervical adenpathy, palpable spleen tip, leukopenia, thrombocytopenia, minimal transaminase elevations, mild pharyngitis with slight tonsillar exudates, chest pain and profuse watery diarrhea, discharged after 21 days	67
Ghana	Liberia	Soldier	Ghana- Accra	32	M	Unknown	2013- May 26	Fever, chills, malaise, headaches, dark urine, renal and liver failure, low platelet count	Vomiting, severe epigastric pain, tachypnoeic, fever, mild jaundice, mild dehydration, moderate abdominal tenderness with no reboud tenderness, death	70
Unknown	Liberia	Solider	Ghana- Accra	27	M	Unknown	2013- May 26	5 days- fever, headache; 3 days- diarrhea, vomiting, severe epigastric pain, dark urine, decreased urine output	Fever, epigastric tenderness, reduced hemoglobin, low platelets, loose stools, vomiting	70
USA	Liberia	Traveler- visiting family	USA- Minneapolis, MN	46	M	2014- March 24	2014- March 30	Fever, nausea, vomiting, diarrhea- initially discharged. 2 days later- acute renal failure	Disoriented on flight, failed to meet family in airport upon arrival, found disoriented in terminal, fever, fast pulse, abdominal pain, rapidly progressive glomerulonephritis, bleeding from nose and mouth, low platelet count, stable viral RNA levels for 10 days, bilateral sensorineural hearing loss by 5th day in hospital	68
Togo	Togo	Nurse	USA- Atlanta, GA	33	M	2016	2016	Fever, sore throat, retro-orbial headache, intermittent hearing loss, leukopenia, thrombocytopenia, mild transaminitis	Weight loss, mild conjunctival pallor, oral thrush, soft precordial systolic murmur, mild bladder distension with suprapubic tenderness, painful diffuse lymphadenopathy, epididymitis, night sweaths, slowly improved hearing	69
Unknown	Togo	Healthcare worker	Germany- Cologne	Unknown	M	Unknown	2016- February 25	Rapidly deteriorating health	Multiple organ failutre, death within a few hours of arrival	72,73
Sweden	Liberia	Traveler	Sweden- Gothenburg	72	F	2016- March 7	2016- March 2	None	5 days after arrival in Sweden- fever (resolved after 3 days), nausea, arthralgia, loose stools, headache. 13 days after arrival in Sweden- bradyphrenia, motivational anhedonia, anorexia. 15 days after arrival in Sweden- Hospitilization, general fatigue, slow speech, irregular pulse, moderately elavted liver proteins, left temporal encephalopathy, bilateral sensorineural nearing loss	71
